# Supplementary material
Source: PubMed Central journal article supplement (PMC4859344)
Supplement: NIHMS645398-supplement-1.pdf [file NIHMS645398-supplement-1.pdf]

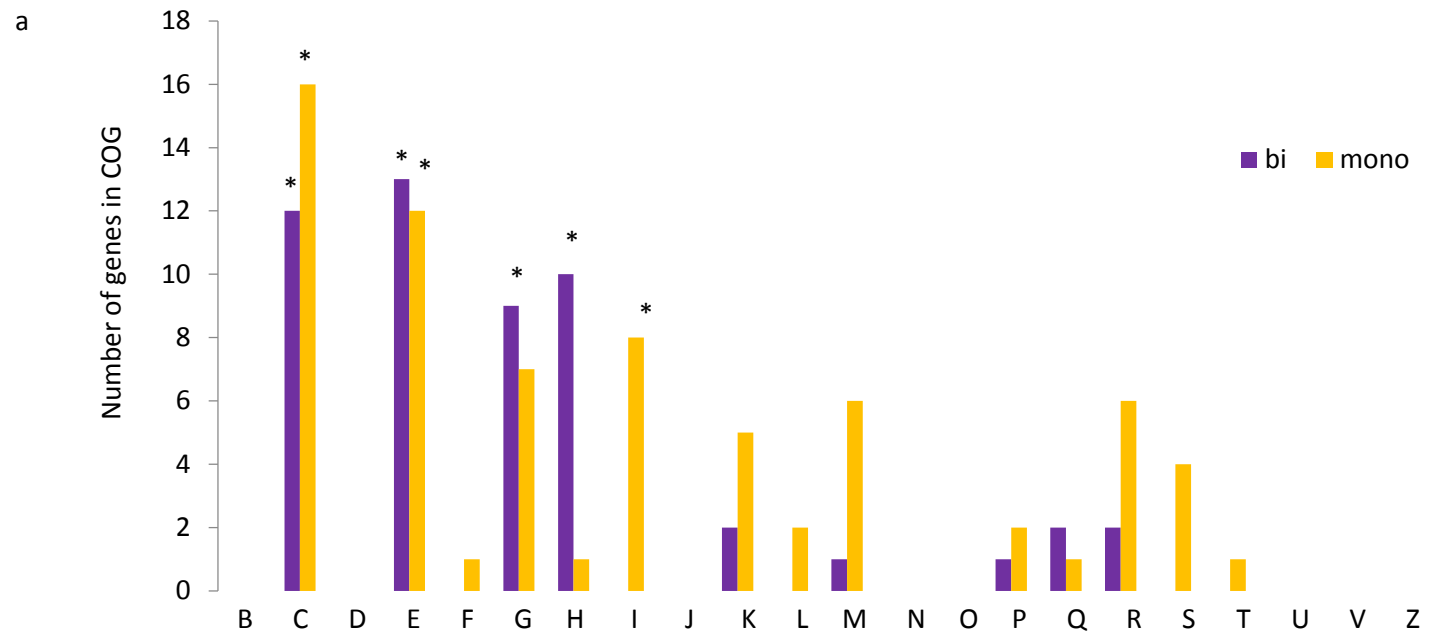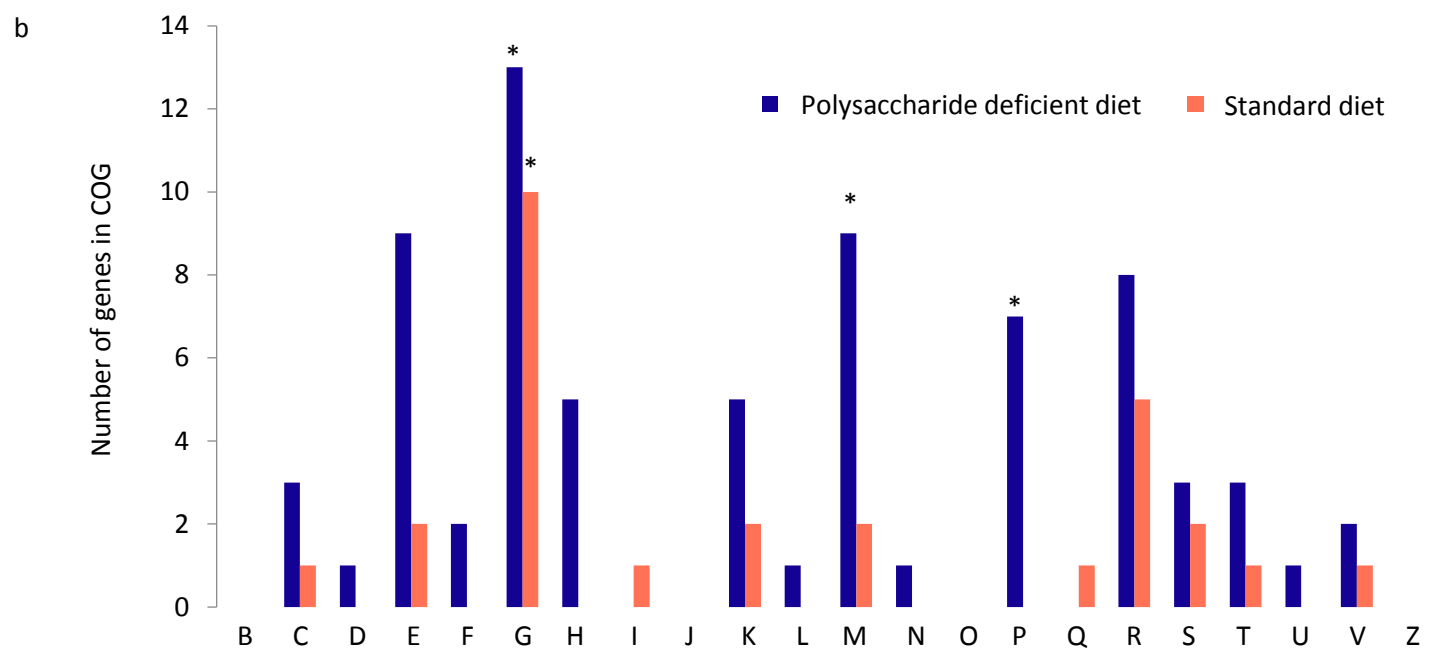

c

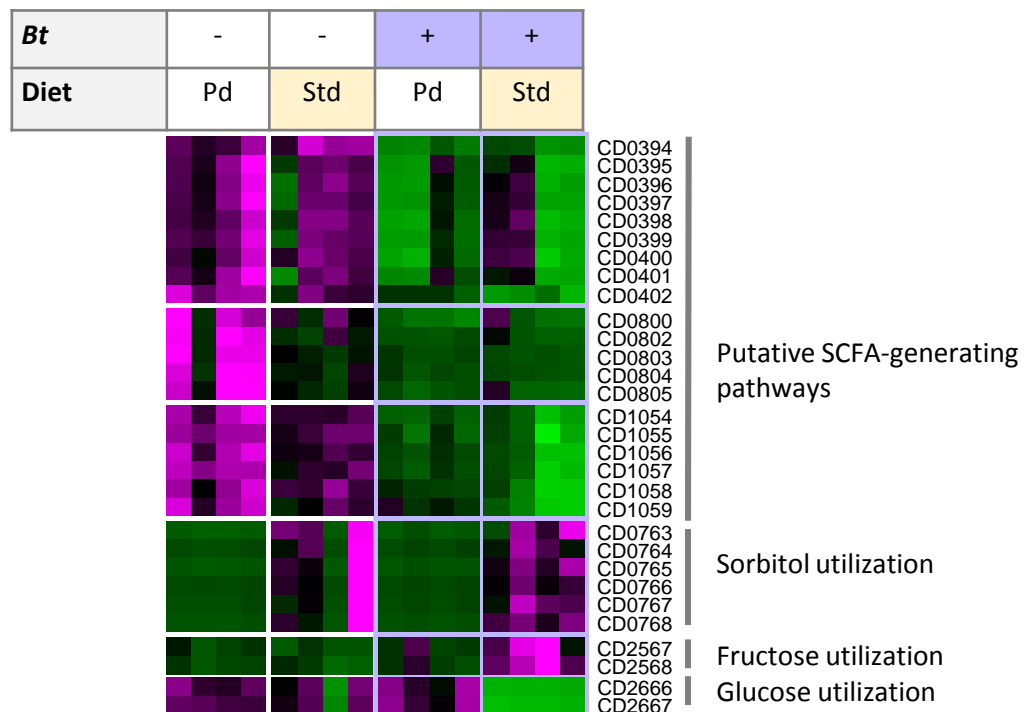

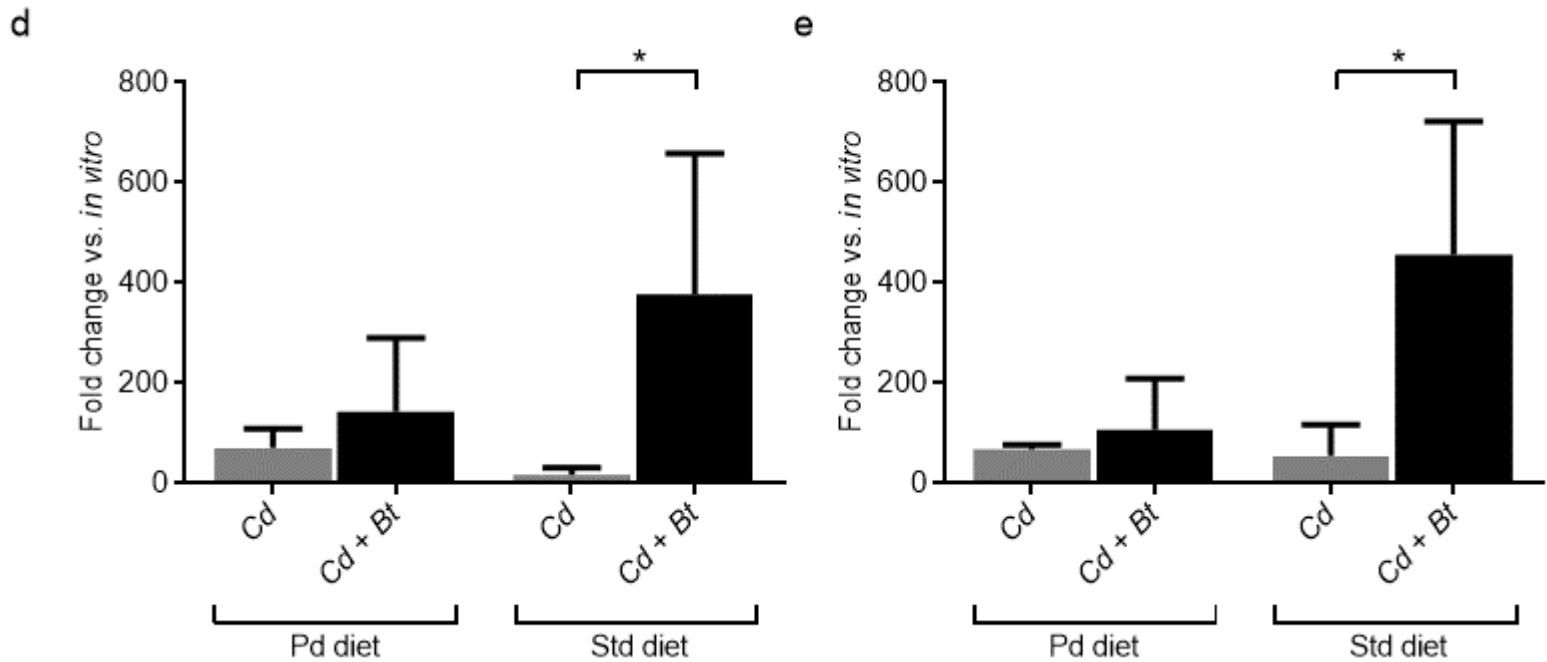

**Figure S1, Related to Figure 1. *C. difficile* genes with altered expression in response to colonization state or diet.**

a., b., Each graph shows the number of genes in each COG category that were significantly upregulated in the comparison between (a.) germ-free mice mono-associated with *C. difficile* (mono) versus *Bt*-biassociated mice colonized with *C. difficile* (bi) and (b.) polysaccharide deficient diet versus standard diet. Letters represent the following COG categories: chromatin structure and dynamics (B); energy production and conversion (C); cell cycle, cell division and chromosome partitioning (D); amino acid transport and metabolism (E); nucleotide transport and metabolism (F); carbohydrate transport and metabolism (G); coenzyme transport and metabolism (H); lipid transport and metabolism (I); translation, ribosomal structure and biogenesis (J); transcription (K); replication, recombination and repair (L); cell wall, membrane and envelope biogenesis (M); cell motility (N); post-translational modification, protein turnover and chaperones (O); inorganic ion transport and metabolism (P); secondary metabolites biosynthesis, transport and catabolism (Q); general function prediction only (R); function unknown (S); signal transduction mechanisms (T); and intracellular trafficking, secretion and vesicular transport (U); and defense mechanisms (V). Bars labeled with \* indicate a significant increase in gene abundance relative to representation in the genome (hypergeometric probability function  $p < 0.01$ ).

c., Additional *C. difficile* operons with significant differences in expression between colonization state and diet. Colors indicate the deviation of each gene's signal above (green) and below (purple) its mean expression value across all sixteen *in vivo* samples ( $n=4$ /group) at 5 days post-infection in the cecal contents.

d., e., Induction of *C. difficile* genes from the succinate to butyrate pathway, including *cat1* (CD2343) (d) and *abfT* (CD2339) (e) in cecal contents at 5 days post-infection, normalized to growth in minimal media with glucose.

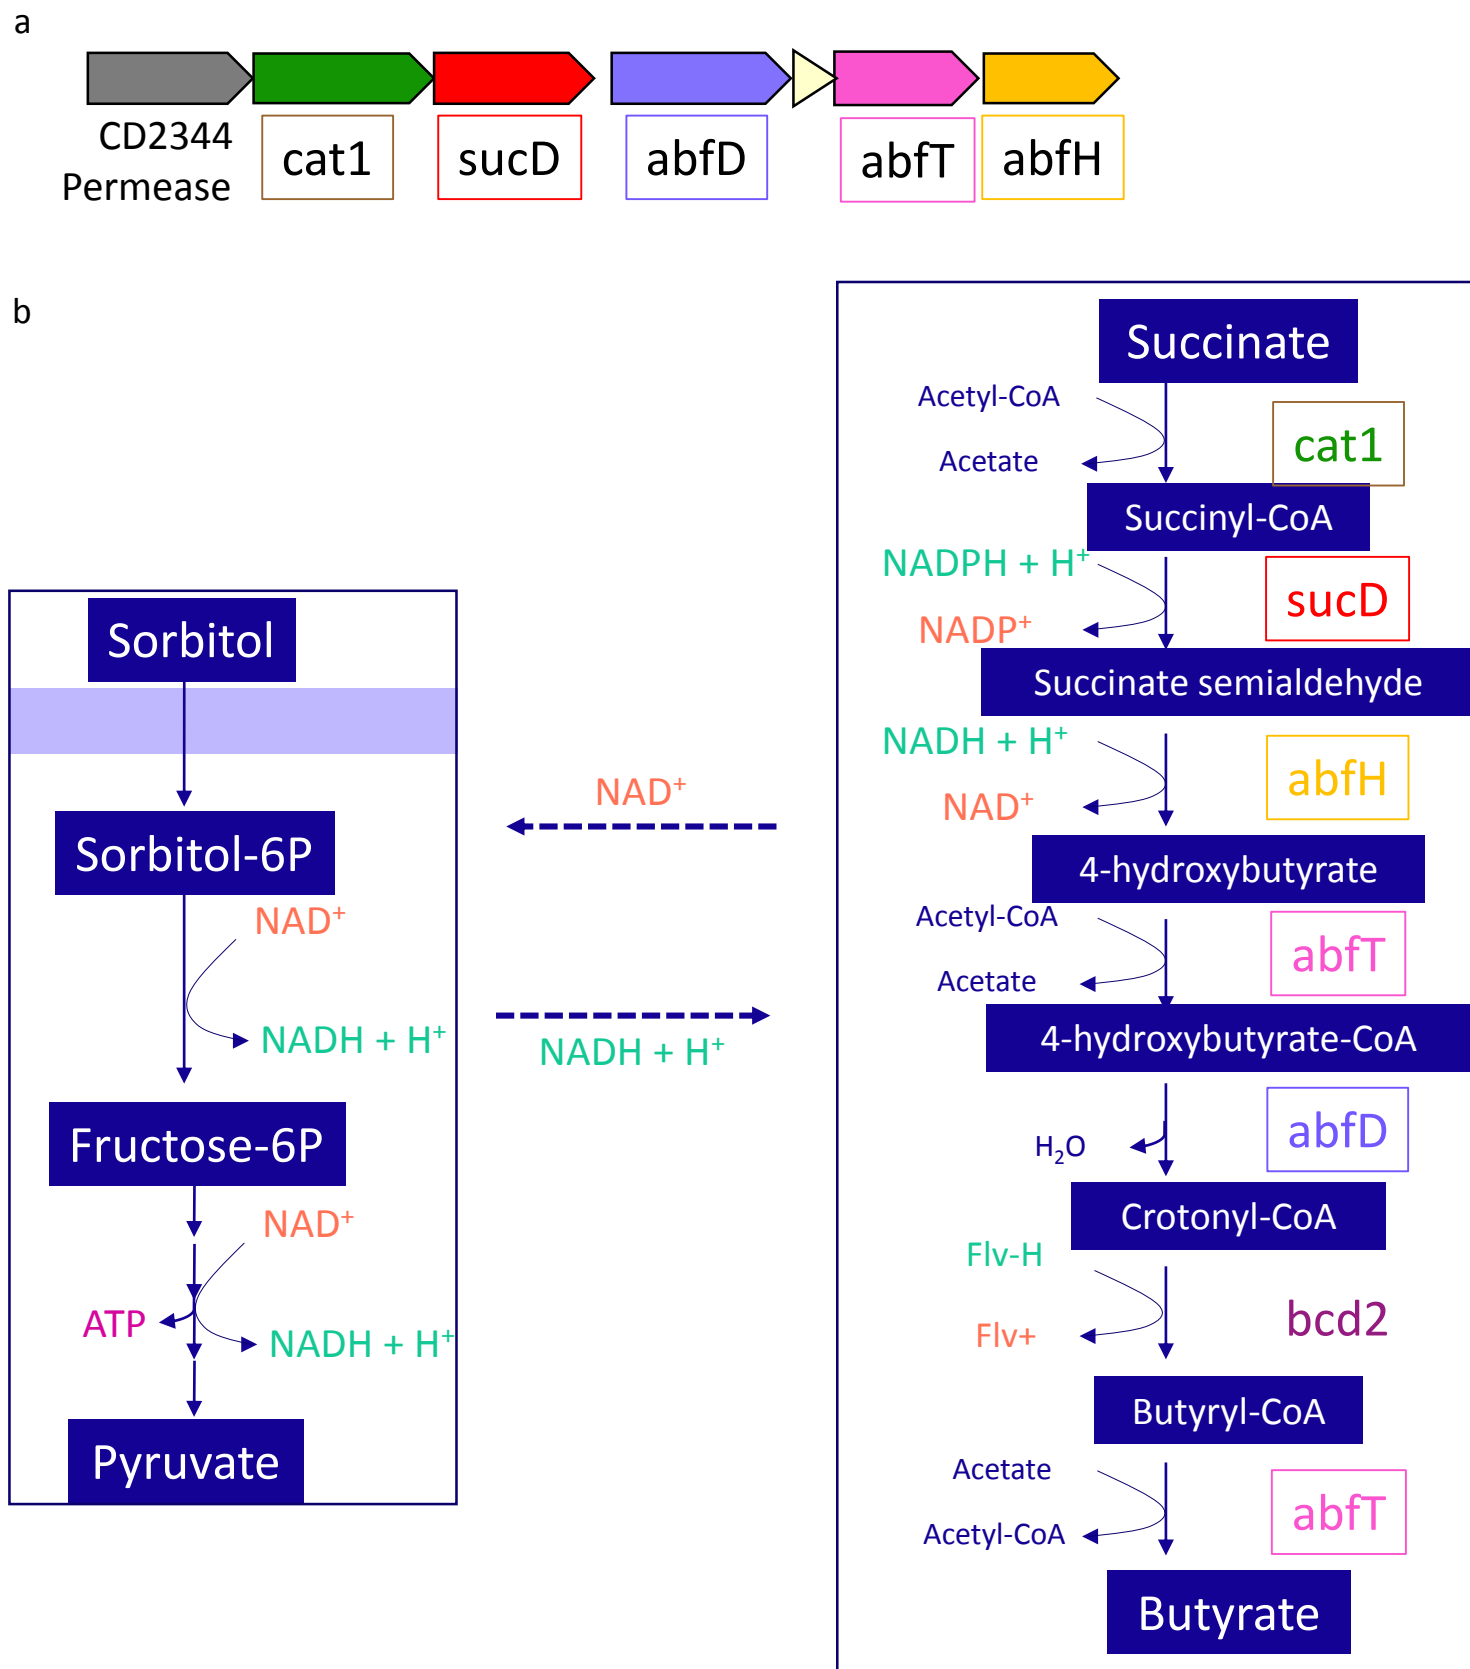

**Figure S2, Related to Figure 2. Overview of the *C. difficile* succinate-to-butyrate operon and pathway.**

- Schematic of the gene cluster comprising the succinate-to-butyrate pathway in *Clostridium difficile* strain 630.
- Schematic of the metabolic pathway for the conversion of succinate to butyrate and fermentation of sorbitol. Potential complementarity of electron flow is noted between pathways.

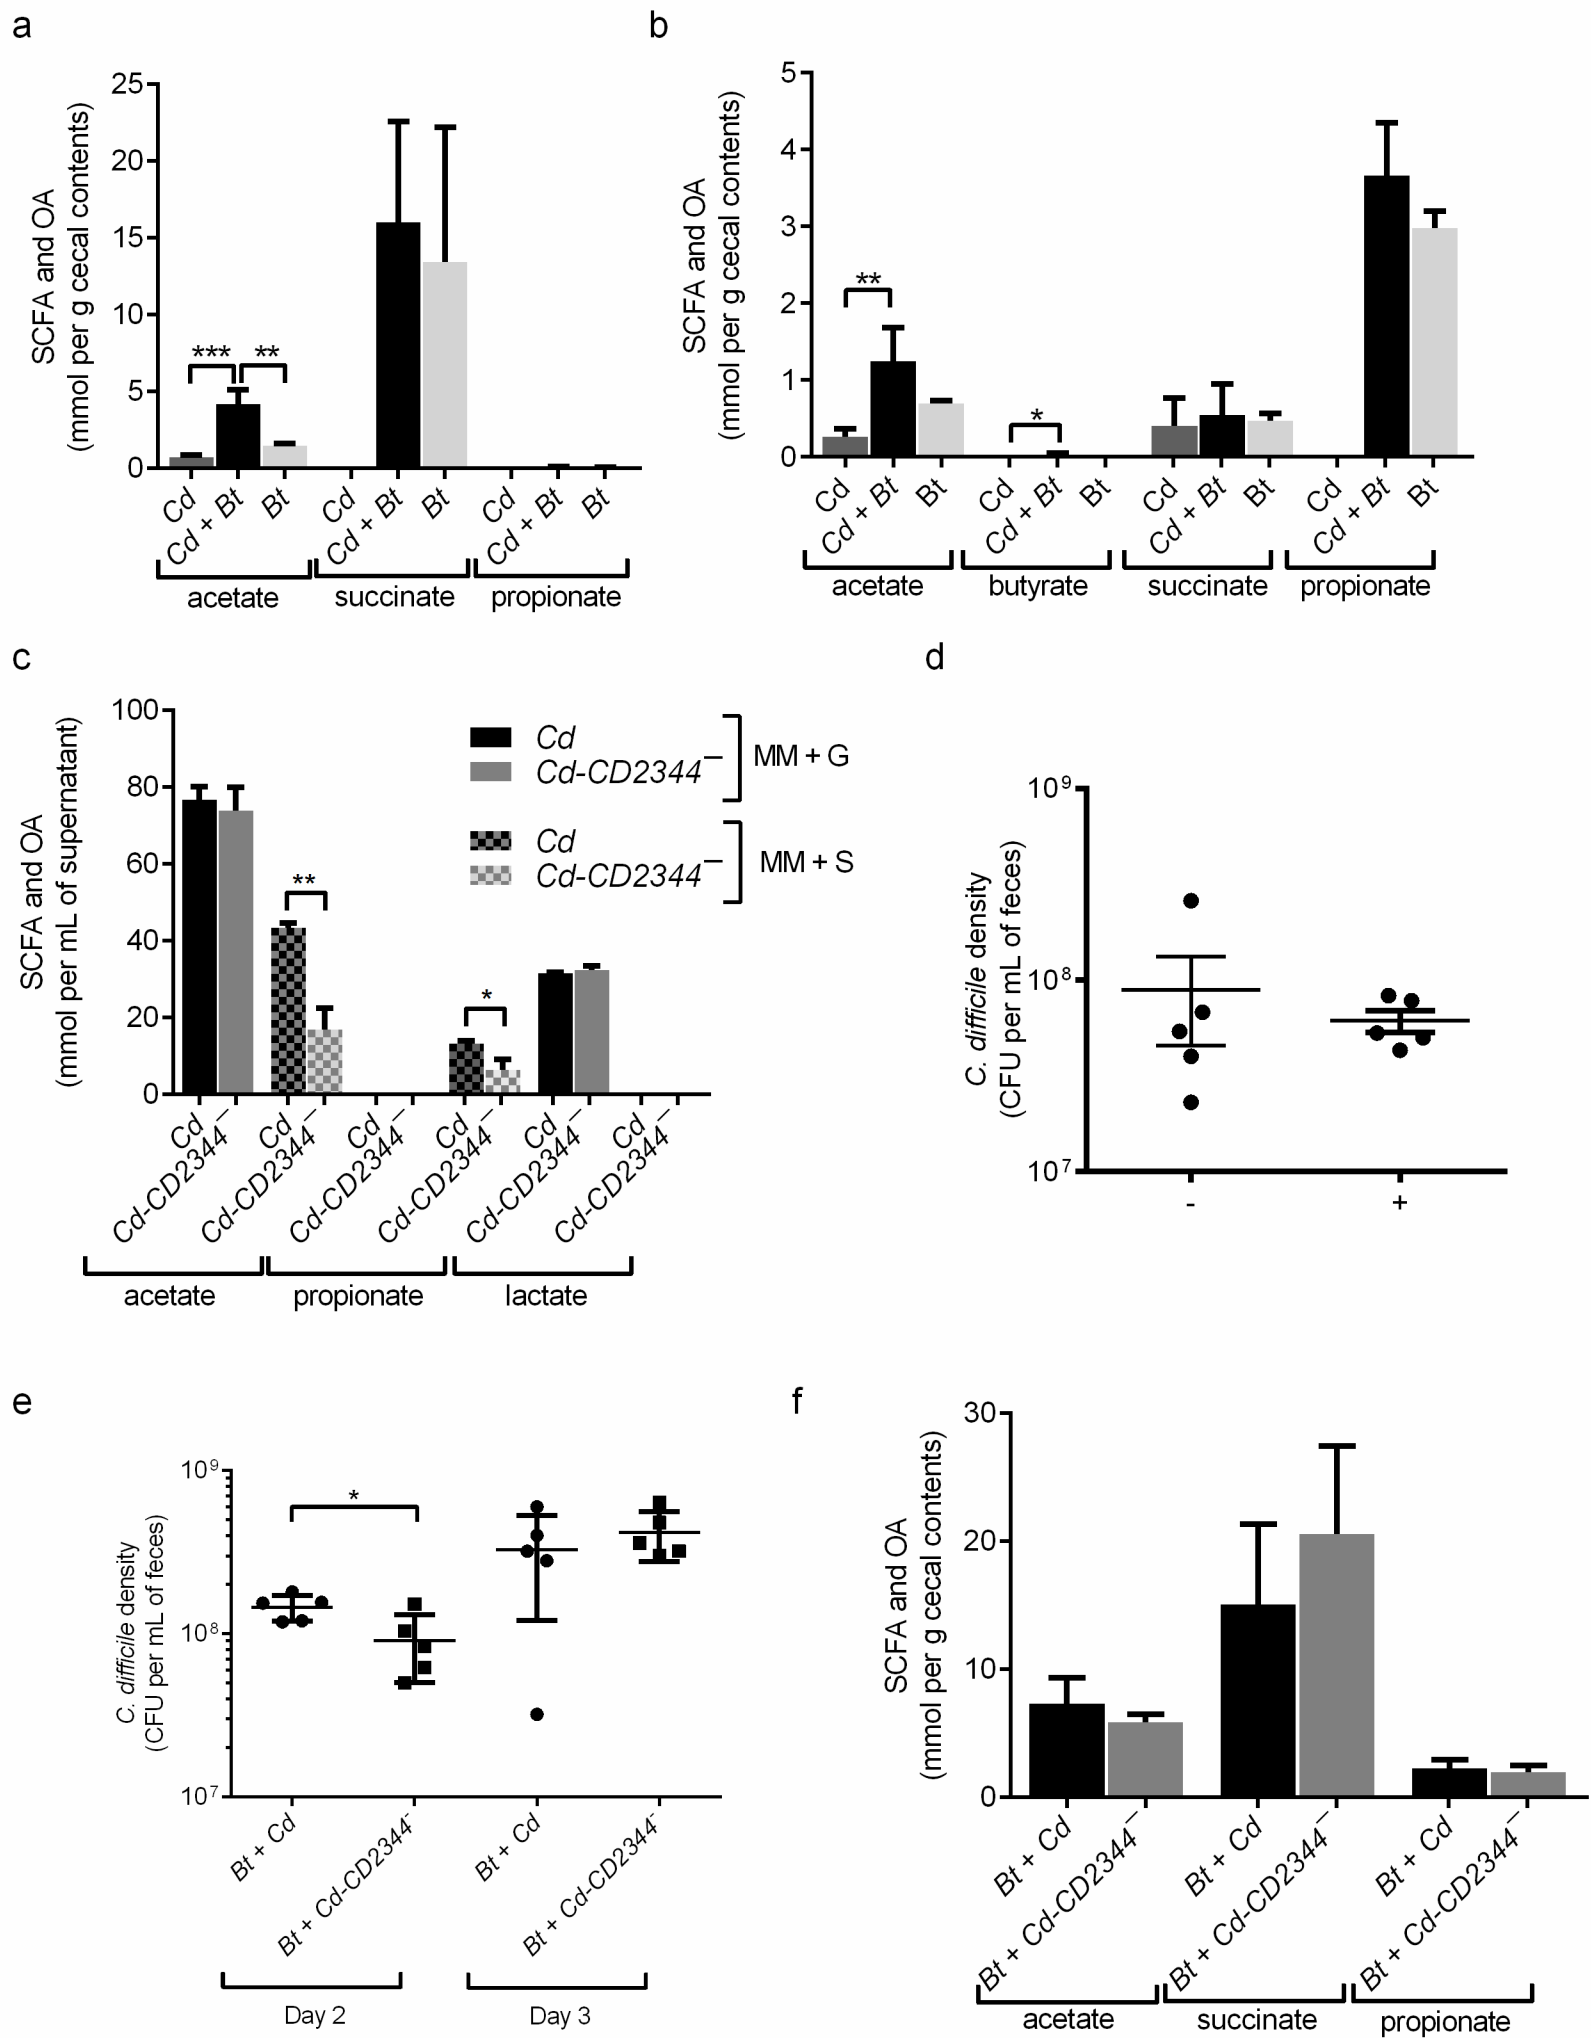

**Figure S3, Related to Figure 3. *Cd* and *Cd-CD2344*<sup>-</sup> production of SCFAs and density in *Bt*-biassociation experiments and *in vitro*.**

- a. Concentration of short-chain fatty acids acetate, succinate and propionate in cecal contents of mice consuming standard diet and colonized with *C. difficile* (*Cd*), *Bt* (*Bt*) or *C. difficile* and *Bt* (*Cd + Bt*) at 5 days post-infection (n=4/group).
- b. Concentration of short-chain fatty acids acetate, butyrate, succinate and propionate in cecal contents of mice consuming polysaccharide-deficient diet and colonized with *C. difficile* (*Cd*), *Bt* (*Bt*) or *C. difficile* and *Bt* (*Cd + Bt*) and at 5 days post-infection (n=4/group).
- c. Concentrations of acetate, propionate or lactate produced by *Cd* or *Cd-CD2344*<sup>-</sup> in minimal media containing 0.5% glucose (filled bars, MM + G) or 0.1% succinate (checkered bars, MM + S) (n=3/group).
- d. *Cd-CD2344*<sup>-</sup> mutant *C. difficile* (*Cd-CD2344*<sup>-</sup>) density in feces of germ-free mice consuming polysaccharide-deficient diet and administered water (-) or water containing 1% sorbitol and 1% succinate (+) at 1 day post-infection (n=5/group).
- e. *C. difficile* density in feces of *Bt*-biassociated mice infected with wild-type *C. difficile* (*Bt + Cd*) or *Cd-CD2344*<sup>-</sup> mutant *C. difficile* (*Bt + Cd-CD2344*<sup>-</sup>) at day 2 and 3 post-infection (n=5/group).
- f. Levels of acetate, succinate and propionate detected in cecal contents of *Bt*-biassociated mice infected with wild-type *C. difficile* (*Cd*) or *Cd-CD2344*<sup>-</sup> mutant *C. difficile* (*Cd-CD2344*<sup>-</sup>) at day 3 post-infection (n=5/group).

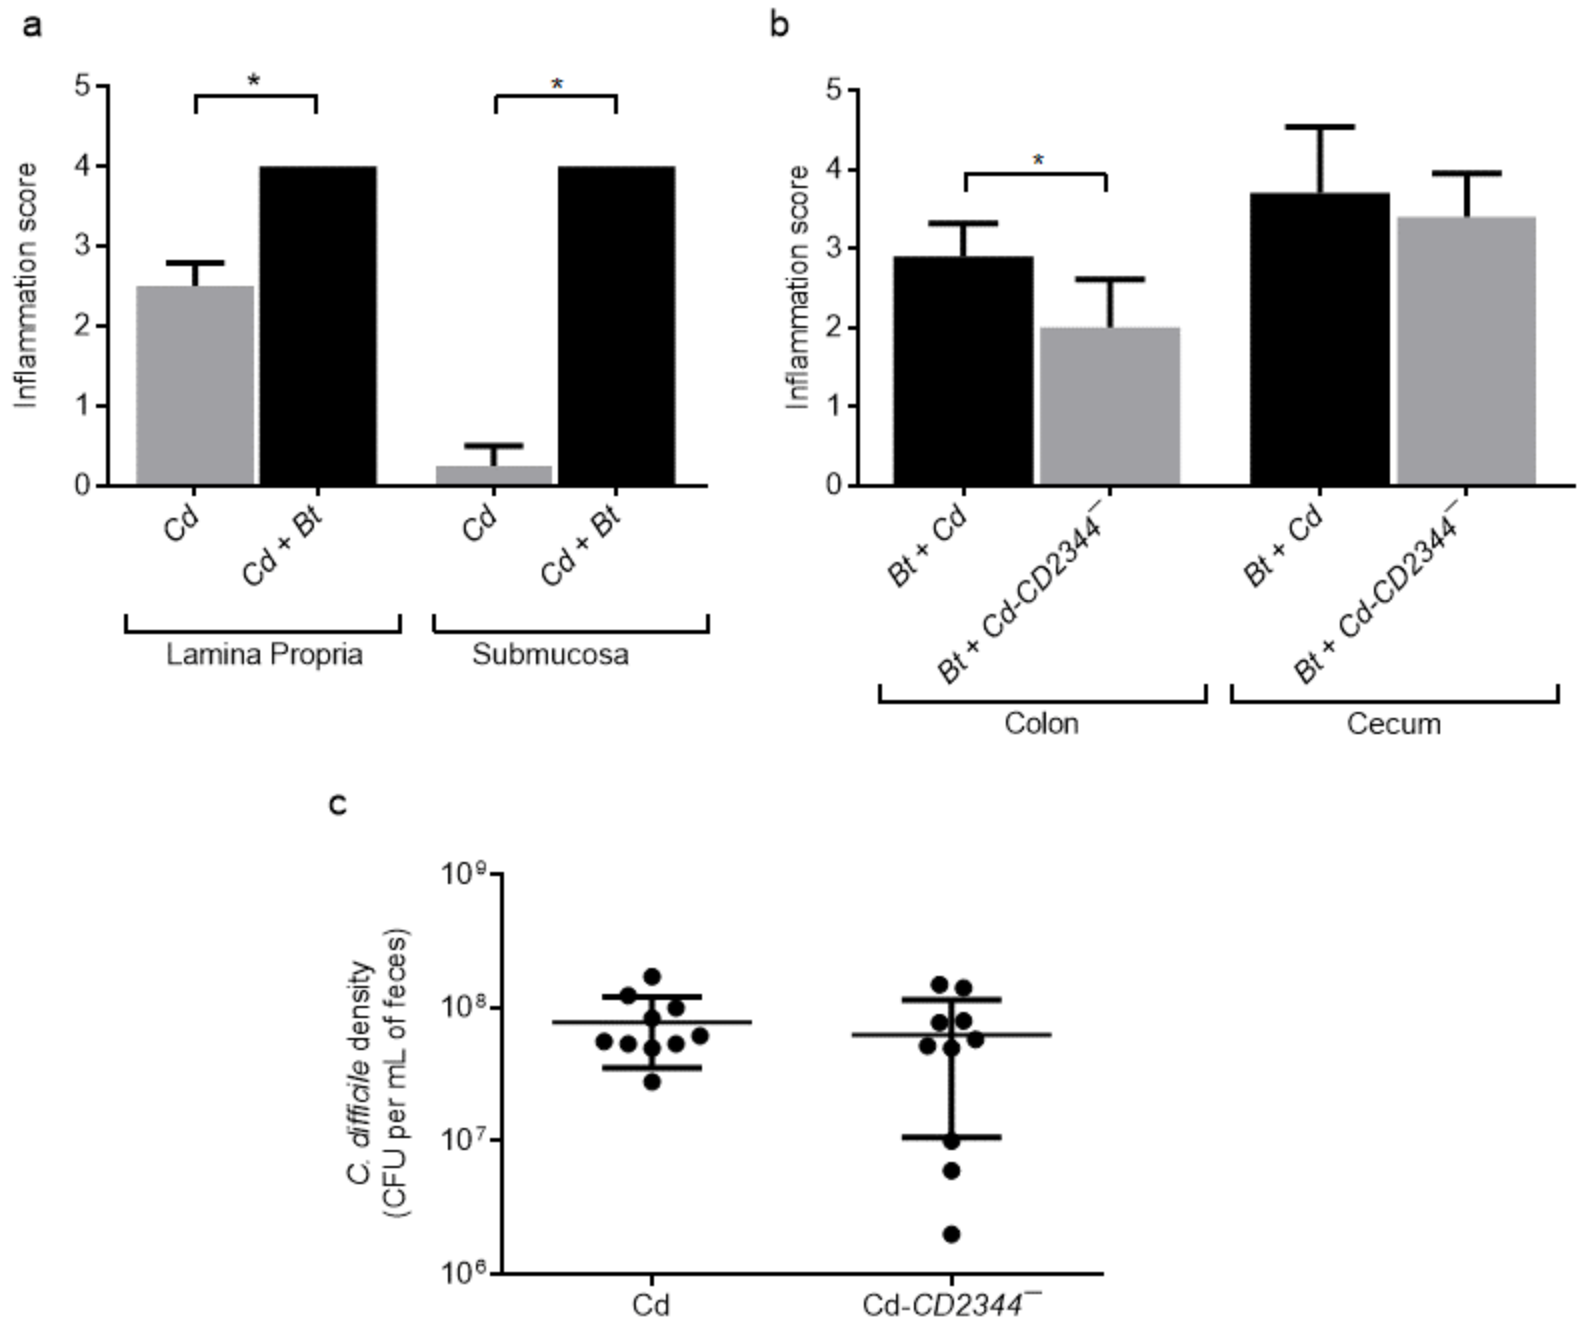

**Figure S4, Related to Figure 4. *C. difficile*-induced inflammation is greater in *Bt*-biassociation.**

- Mean pathology score of H&E stained formalin fixed sections from mouse cecum of mice in monoassociation with *C. difficile* (*Cd*) or *Bt*-biassociation with *C. difficile* (*Cd + Bt*) at day 5 post-infection (n=4/group). Statistical analysis conducted by Mann Whitney nonparametric test. \* indicates p<0.05.
- Mean pathology scores from the lamina propria of the colon or cecum of mice colonized with *Bt*-biassociated mice infected with wild-type *C. difficile* (*Bt + Cd*) or *Cd*-CD2344<sup>-</sup> mutant *C. difficile* (*Bt + Cd-CD2344<sup>-</sup>*) at day 3 post-infection (n=4/group). Statistical analysis conducted by Mann Whitney nonparametric test. \* indicates p<0.05.
- Density of *C. difficile* in feces of conventional, streptomycin-treated mice infected with wild-type *C. difficile* (*Cd*) or *Cd*-CD2344<sup>-</sup> mutant *C. difficile* (*Cd-CD2344<sup>-</sup>*) (n=10/group).

# Supplemental Table S1, Related to Figure 1. Genes upregulated in *Bt*-biassociation vs. monoassociation

Fold change is provided when the gene's expression provided a false discovery rate of <1% for the indicated comparison. Blocks of genes highlighted in red, green, and yellow indicate the succinate-to-butyrate pathway, sialic acid utilization, and ethanolamine pathway, respectively.

|         |                                                  | Both<br>chows  | Std            | Pd             |
|---------|--------------------------------------------------|----------------|----------------|----------------|
| Gene ID | Gene Annotation                                  | Fold<br>Change | Fold<br>Change | Fold<br>Change |
| CD0135  | PTS system, IIa component                        | 10.2           |                | 15.9           |
| CD0136  | PTS system, IIb component                        | 7.3            |                | 13.7           |
| CD0137  | PTS system, IIc component                        | 10.8           |                | 18.3           |
| CD0138  | hypothetical protein                             | 12.2           |                | 20.5           |
| CD0139  | glycosylasparaginase                             | 7.3            |                | 14.3           |
| CD0141  | putative copper homeostasis protein              | 6.6            |                | 9.2            |
| CD0324  | putative cobalt transport protein                |                |                | 3.6            |
| CD0325  | cobalt transport protein                         |                |                | 3.1            |
| CD0334  | aldehyde-alcohol dehydrogenase [includes: alcc   | 12.1           |                | 8.4            |
| CD0448  | putative amino acid racemase                     |                |                | 4.6            |
| CD0625  | putative phage-related regulatory protein        |                |                | 1.7            |
| CD0667  | putative lantibiotic ABC transporter,ATP-binding |                |                | 2.2            |
| CD0678  | putative transcriptional regulator               |                |                | 1.7            |
| CD0990  | 3-isopropylmalate dehydratase large subunit      |                |                | 2.8            |
| CD1009  | GntR-family transcriptional regulator            |                |                | 6.4            |
| CD1010  | N-acetylglucosamine-6-phosphate deacetylase      |                |                | 8.2            |
| CD1011  | glucosamine-6-phosphate deaminase                |                |                | 8.2            |
| CD1565  | ketol-acid reductoisomerase                      | 3.1            |                | 3.7            |
| CD1594  | putative O-acetylserine sulfhydrylase            |                |                | 5.0            |
| CD1595  | serine acetyltransferase                         |                |                | 4.3            |
| CD1599  | putative phosphomethylpyrimidine kinase          |                |                | 11.3           |
| CD1600  | hydroxyethylthiazole kinase                      |                |                | 10.0           |
| CD1601  | thiamine-phosphate pyrophosphorylase             |                |                | 9.0            |
| CD1602  | PTS system, IIb component                        |                |                | 3.0            |
| CD1702  | thiamine biosynthesis protein                    |                |                | 99.4           |
| CD1702A | putative thiamine biosynthesis protein           |                |                | 58.9           |
| CD1703  | putative thiamine biosynthesis protein           |                |                | 90.1           |
| CD1704  | thiazole biosynthesis protein                    |                |                | 134.7          |
| CD1705  | putative thiamine biosynthesis protein           |                |                | 134.9          |
| CD1706  | putative thiamine biosynthesis protein           |                |                | 34.6           |
| CD1914  | putative ethanolamine/propanediol ammonia-ly     | 3.0            |                |                |
| CD1918  | putative ethanolamine/propanediol utilization p  | 2.5            |                |                |
| CD1919  | putative ethanolamine/propanediol utilization c  | 2.8            |                |                |

|        |                                                |      |     |      |
|--------|------------------------------------------------|------|-----|------|
| CD1978 | ABC transporter, ATP-binding protein           |      |     | 3.0  |
| CD2232 | anaerobic sulfite reductase subunit B          |      |     | 2.1  |
| CD2235 | RpiR-family transcriptional regulator          |      |     | 9.0  |
| CD2236 | putative glucokinase                           | 9.9  |     | 14.8 |
| CD2237 | hypothetical protein                           | 10.1 |     | 24.1 |
| CD2238 | hypothetical protein                           | 8.3  |     | 32.3 |
| CD2239 | putative sodium:solute symporter               | 15.9 |     | 57.4 |
| CD2240 | N-acetylneuraminate lyase                      | 18.9 |     | 81.9 |
| CD2241 | putative N-acetylmannosamine-6-phosphate 2-    | 20.9 |     | 88.0 |
| CD2338 | NAD-dependent 4-hydroxybutyrate dehydrogen     | 5.3  | 4.9 |      |
| CD2339 | 4-hydroxybutyrate CoA transferase              | 7.1  | 6.9 |      |
| CD2340 | hypothetical protein                           | 5.0  | 5.1 | 3.3  |
| CD2341 | gamma-aminobutyrate metabolism dehydratase     | 4.9  | 4.9 | 3.9  |
| CD2342 | succinate-semialdehyde dehydrogenase (NAD(P    | 7.5  | 5.5 |      |
| CD2343 | succinyl-CoA:coenzyme A transferase            | 8.2  | 5.3 |      |
| CD2344 | hypothetical protein                           | 7.7  | 4.3 |      |
| CD2370 | nicotinate-nucleotide pyrophosphorylase (carbo | 2.2  | 2.4 |      |
| CD2423 | probable transporter                           | 8.2  |     |      |
| CD2424 | putative aminotransferase                      | 8.3  |     |      |
| CD2425 | phosphate butyryltransferase                   | 10.2 |     |      |
| CD2568 | PTS system, IIC component                      |      | 2.4 |      |
| CD2702 | putative branched-chain amino acid transport s | 3.0  |     | 2.5  |
| CD2938 | hypothetical protein                           |      | 1.7 |      |

**Supplemental Table S2, Related to Experimental Procedures. List of primers.**

| Name          | Sequence                                                         | Notes                                                                              |
|---------------|------------------------------------------------------------------|------------------------------------------------------------------------------------|
| IBS           | AAAAAAGCTTATAATTATCCTTAGTCATCGCATAAGTGC<br>GCCCAGATAGGGTG        | Primer used to make <i>Cd-CD2344</i> <sup>-</sup>                                  |
| EBS1d         | CAGATTGTACAAATGTGGTGATAACAGATAAGTCGCAT<br>AAGTTAACTTACCTTTCTTTGT | Primer used to make <i>Cd-CD2344</i> <sup>-</sup>                                  |
| EBS2          | TGAACGCAAGTTTCTAATTCGATTATGACTCGATAGAG<br>GAAAGTGTCT             | Primer used to make <i>Cd-CD2344</i> <sup>-</sup>                                  |
| EBS Universal | CGAAATTAGAACTTGC GTTCAGTAAAC                                     | Primer used to make <i>Cd-CD2344</i> <sup>-</sup>                                  |
| 2344F         | TGCAGCAGTTGGTCTATTGG                                             | qPCR primer                                                                        |
| 2344R         | AGCTAATCCAGGCGAACTTG                                             | qPCR primer (For wild-type CD2344 amplification)                                   |
| CDEP692       | GTAAATTCAGATTCTCGGC                                              | qPCR reverse primer ( <i>Cd-CD2344</i> <sup>-</sup> mutant specific amplification) |
